# Supplementary figures and images for: Graphene or MoS2 nanopores: pore adhesion and protein linearization
Source: Royal Society of Chemistry journal article supplement (doi:10.1039/d4nr03966a), 2024-12-12

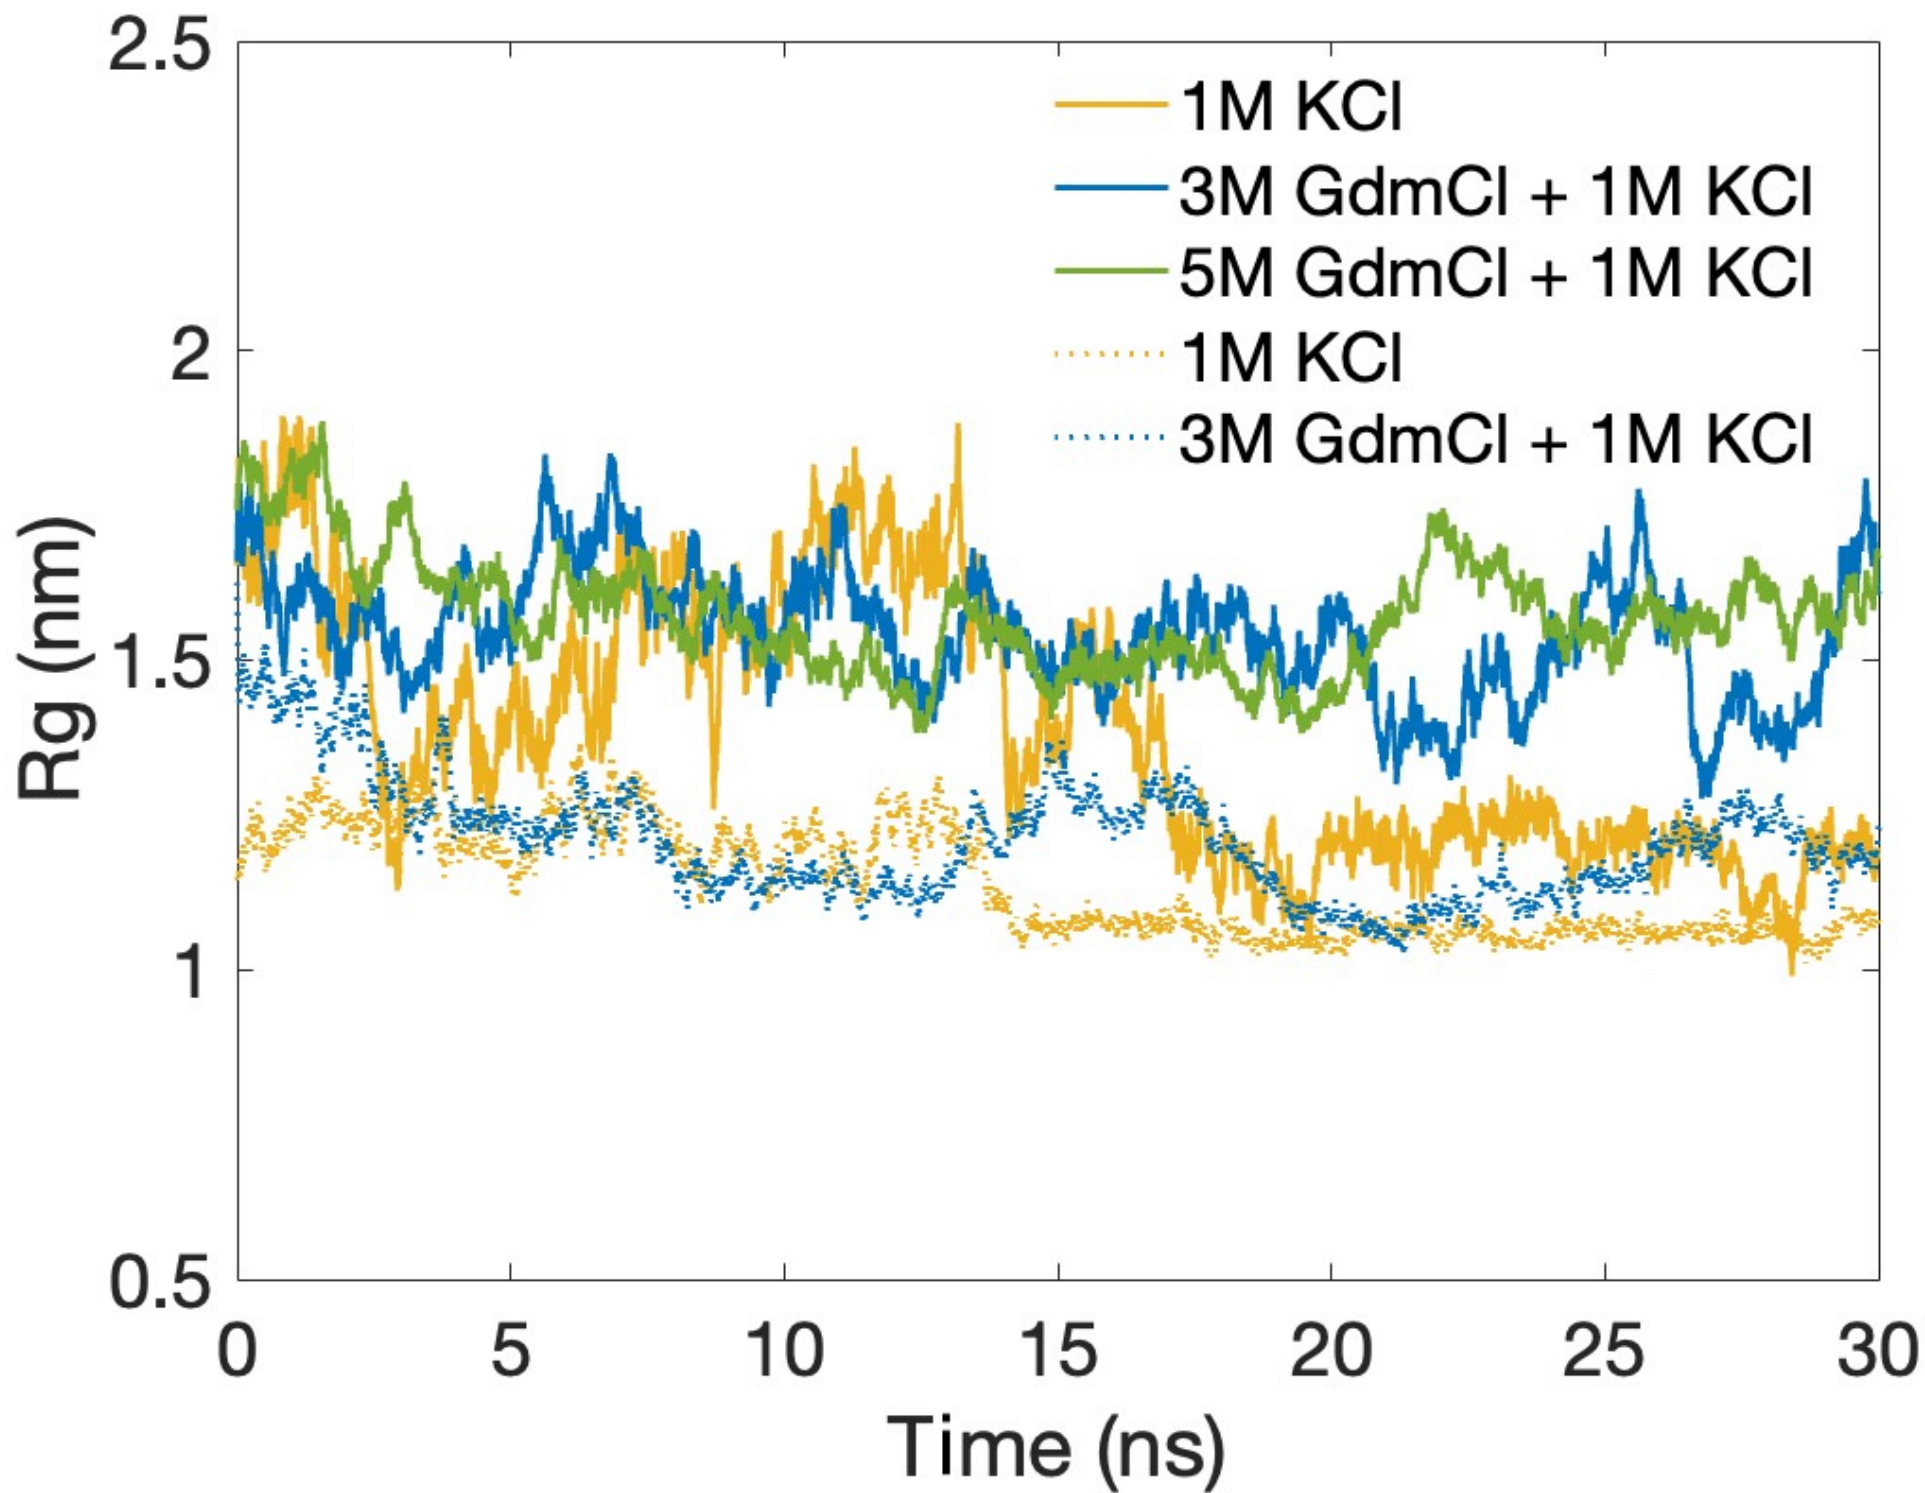

Supplement: d4nr03966a1.pdf [file d4nr03966a1.pdf]

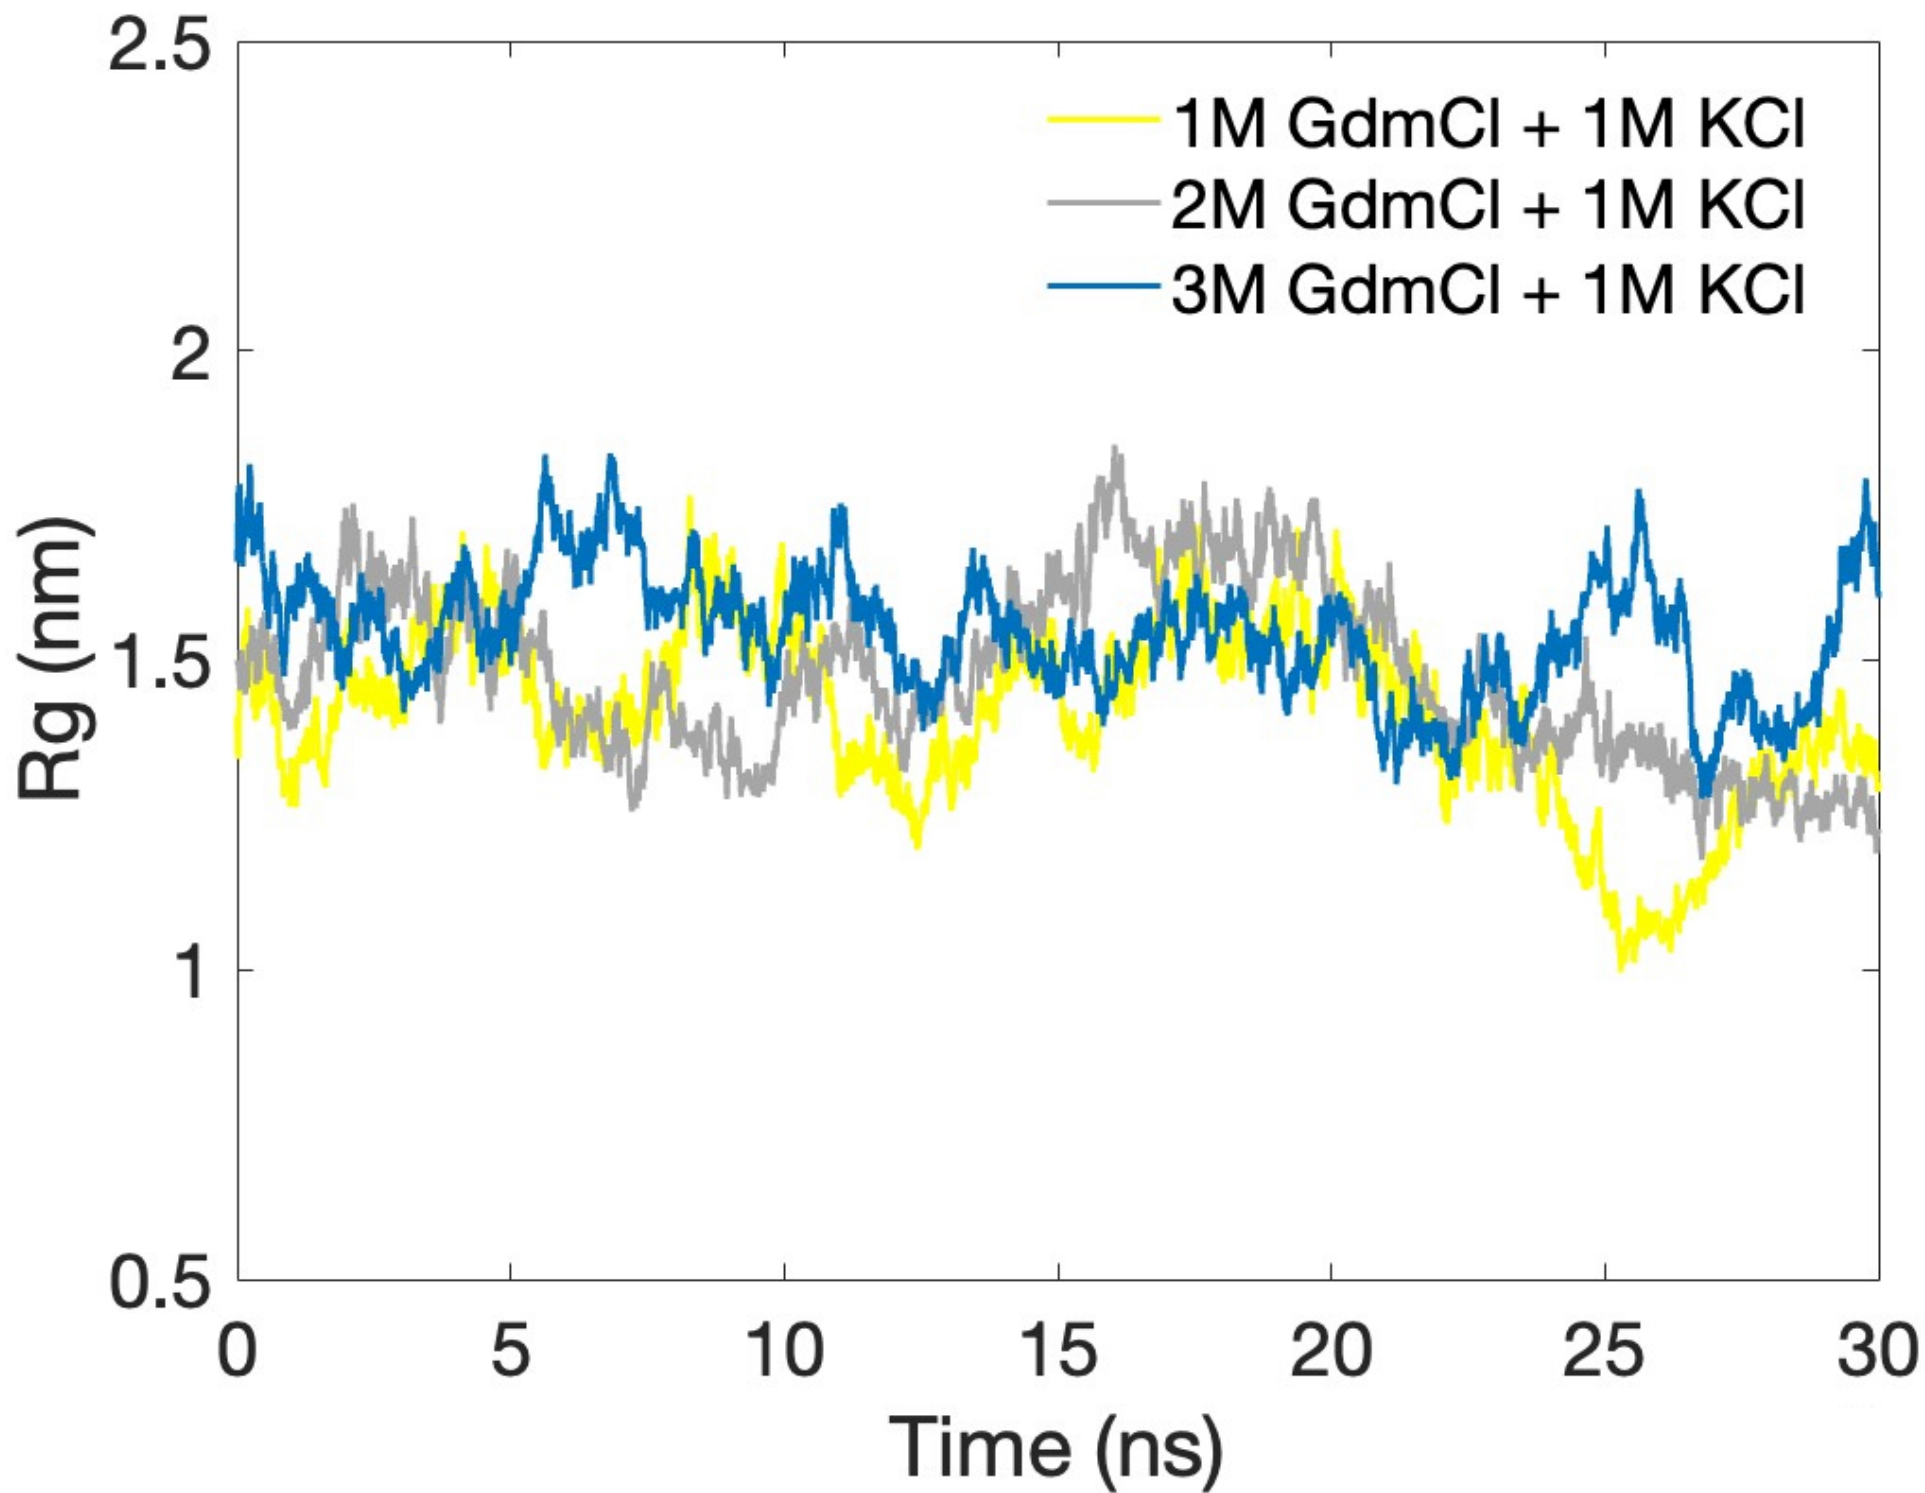

Supplement: d4nr03966a2.pdf [file d4nr03966a2.pdf]

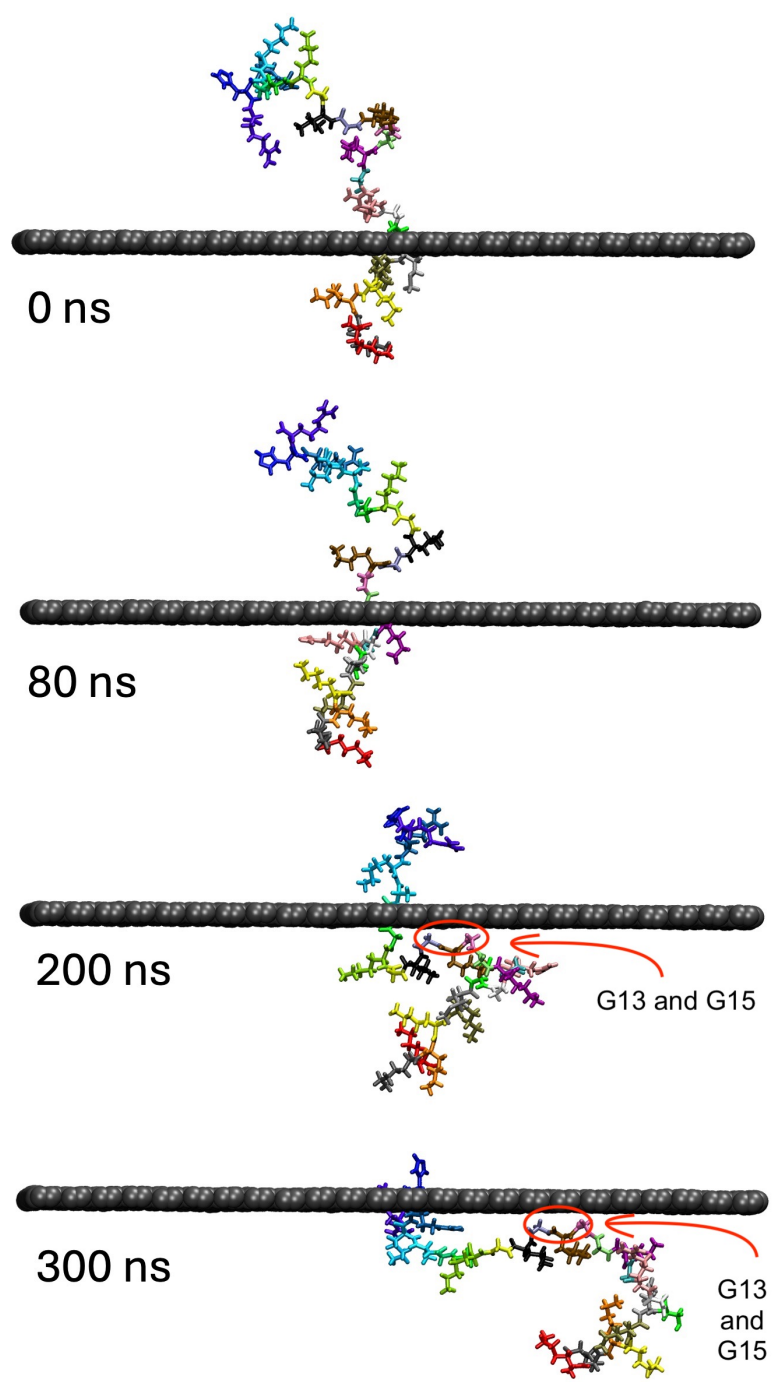

Supplement: d4nr03966a3.pdf [file d4nr03966a3.pdf]

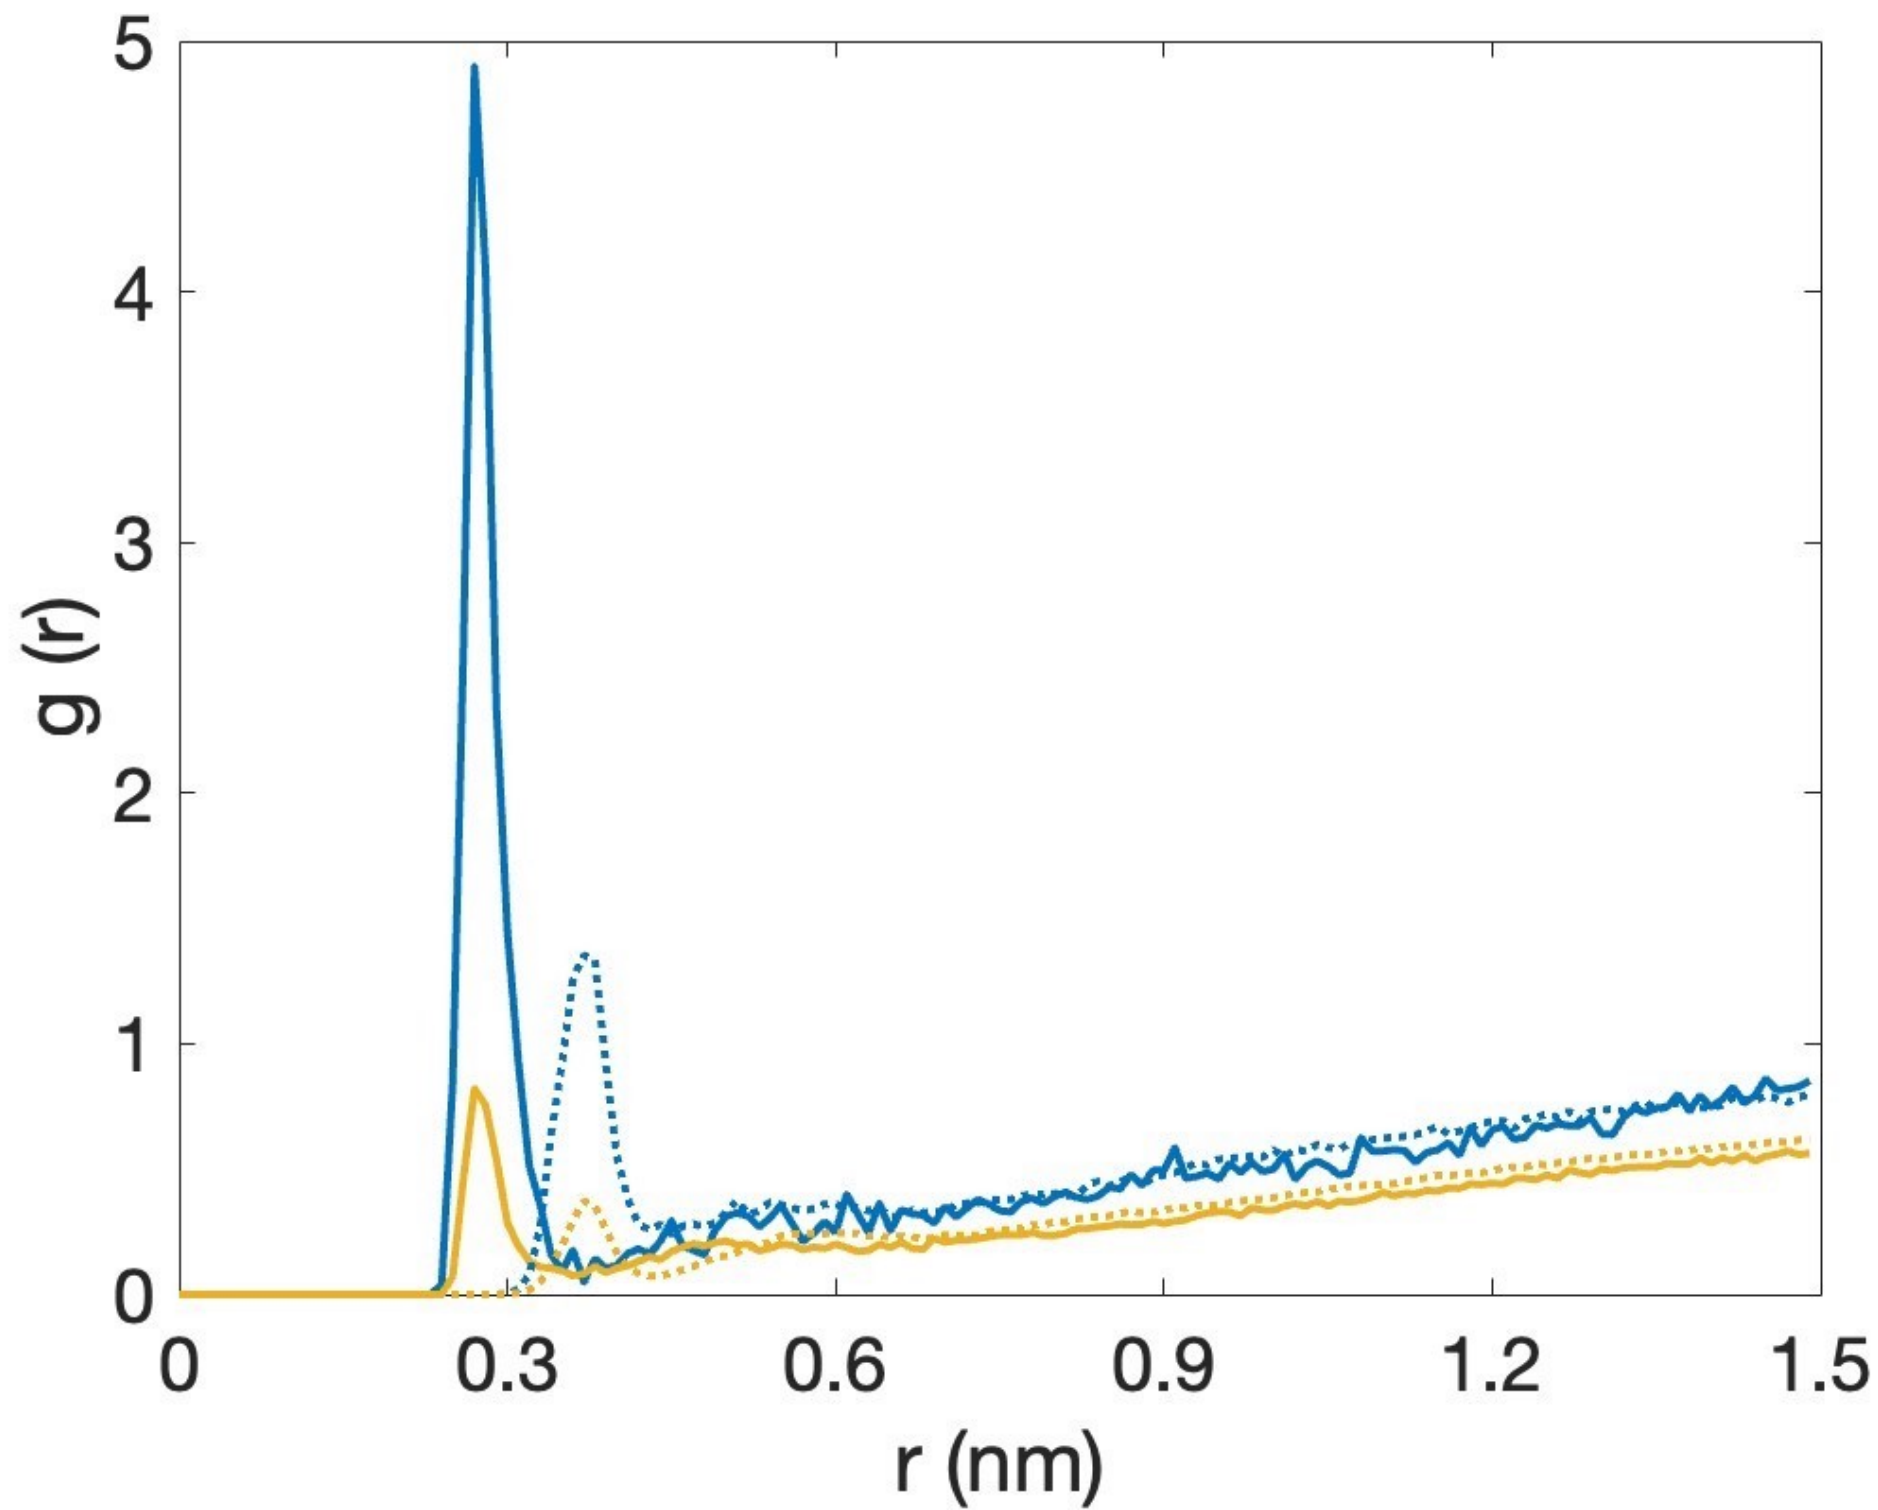

Supplement: d4nr03966a4.pdf [file d4nr03966a4.pdf]

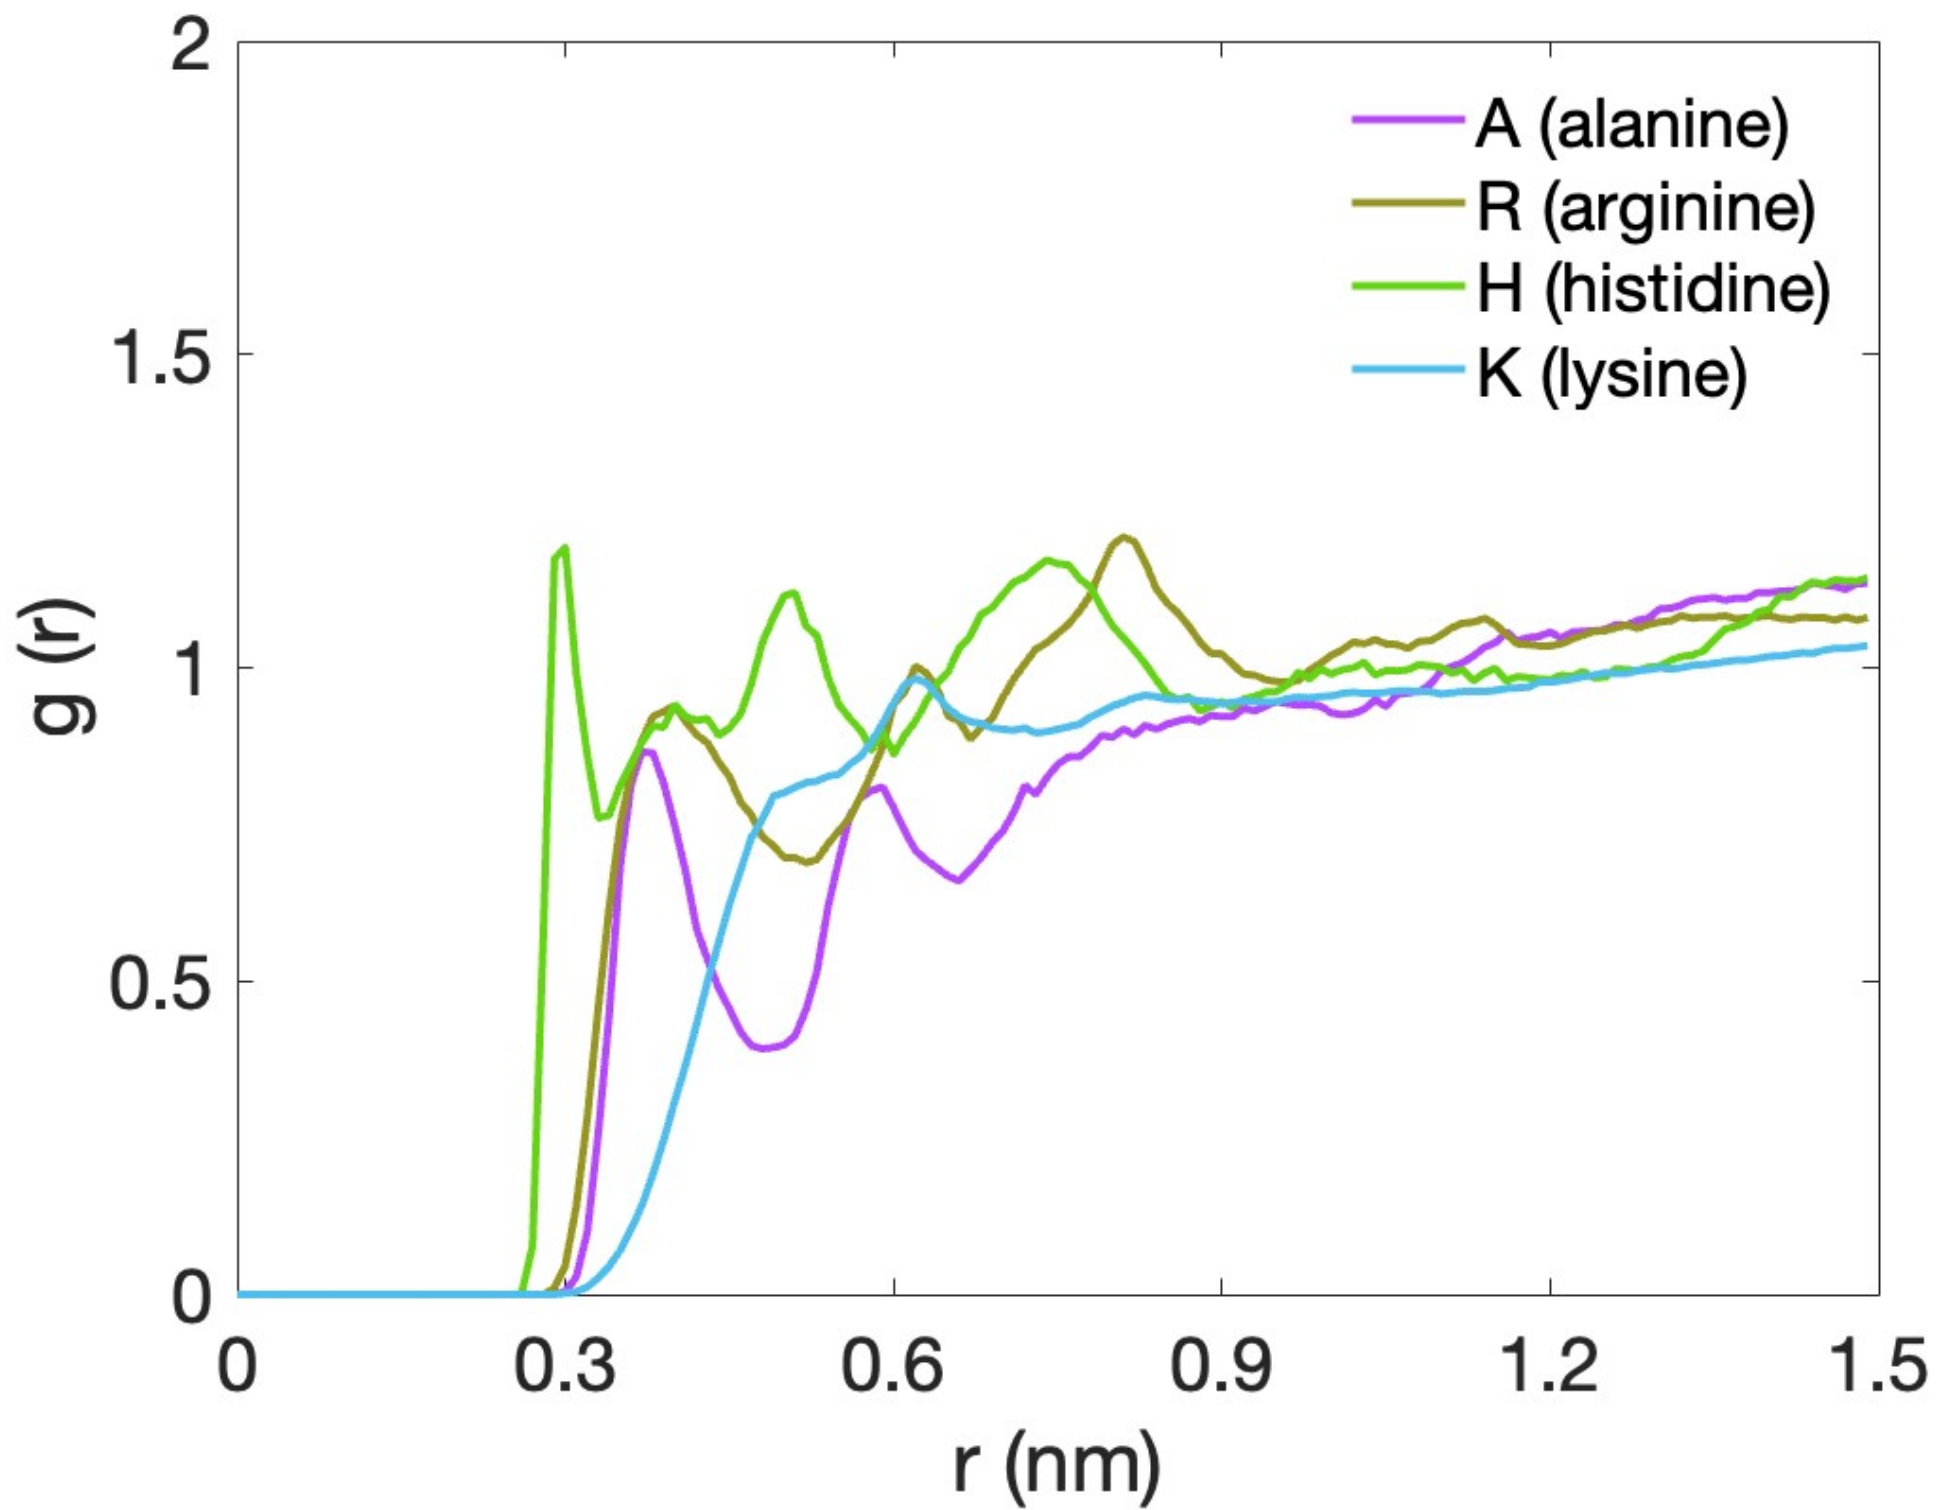

Supplement: d4nr03966a5.pdf [file d4nr03966a5.pdf]

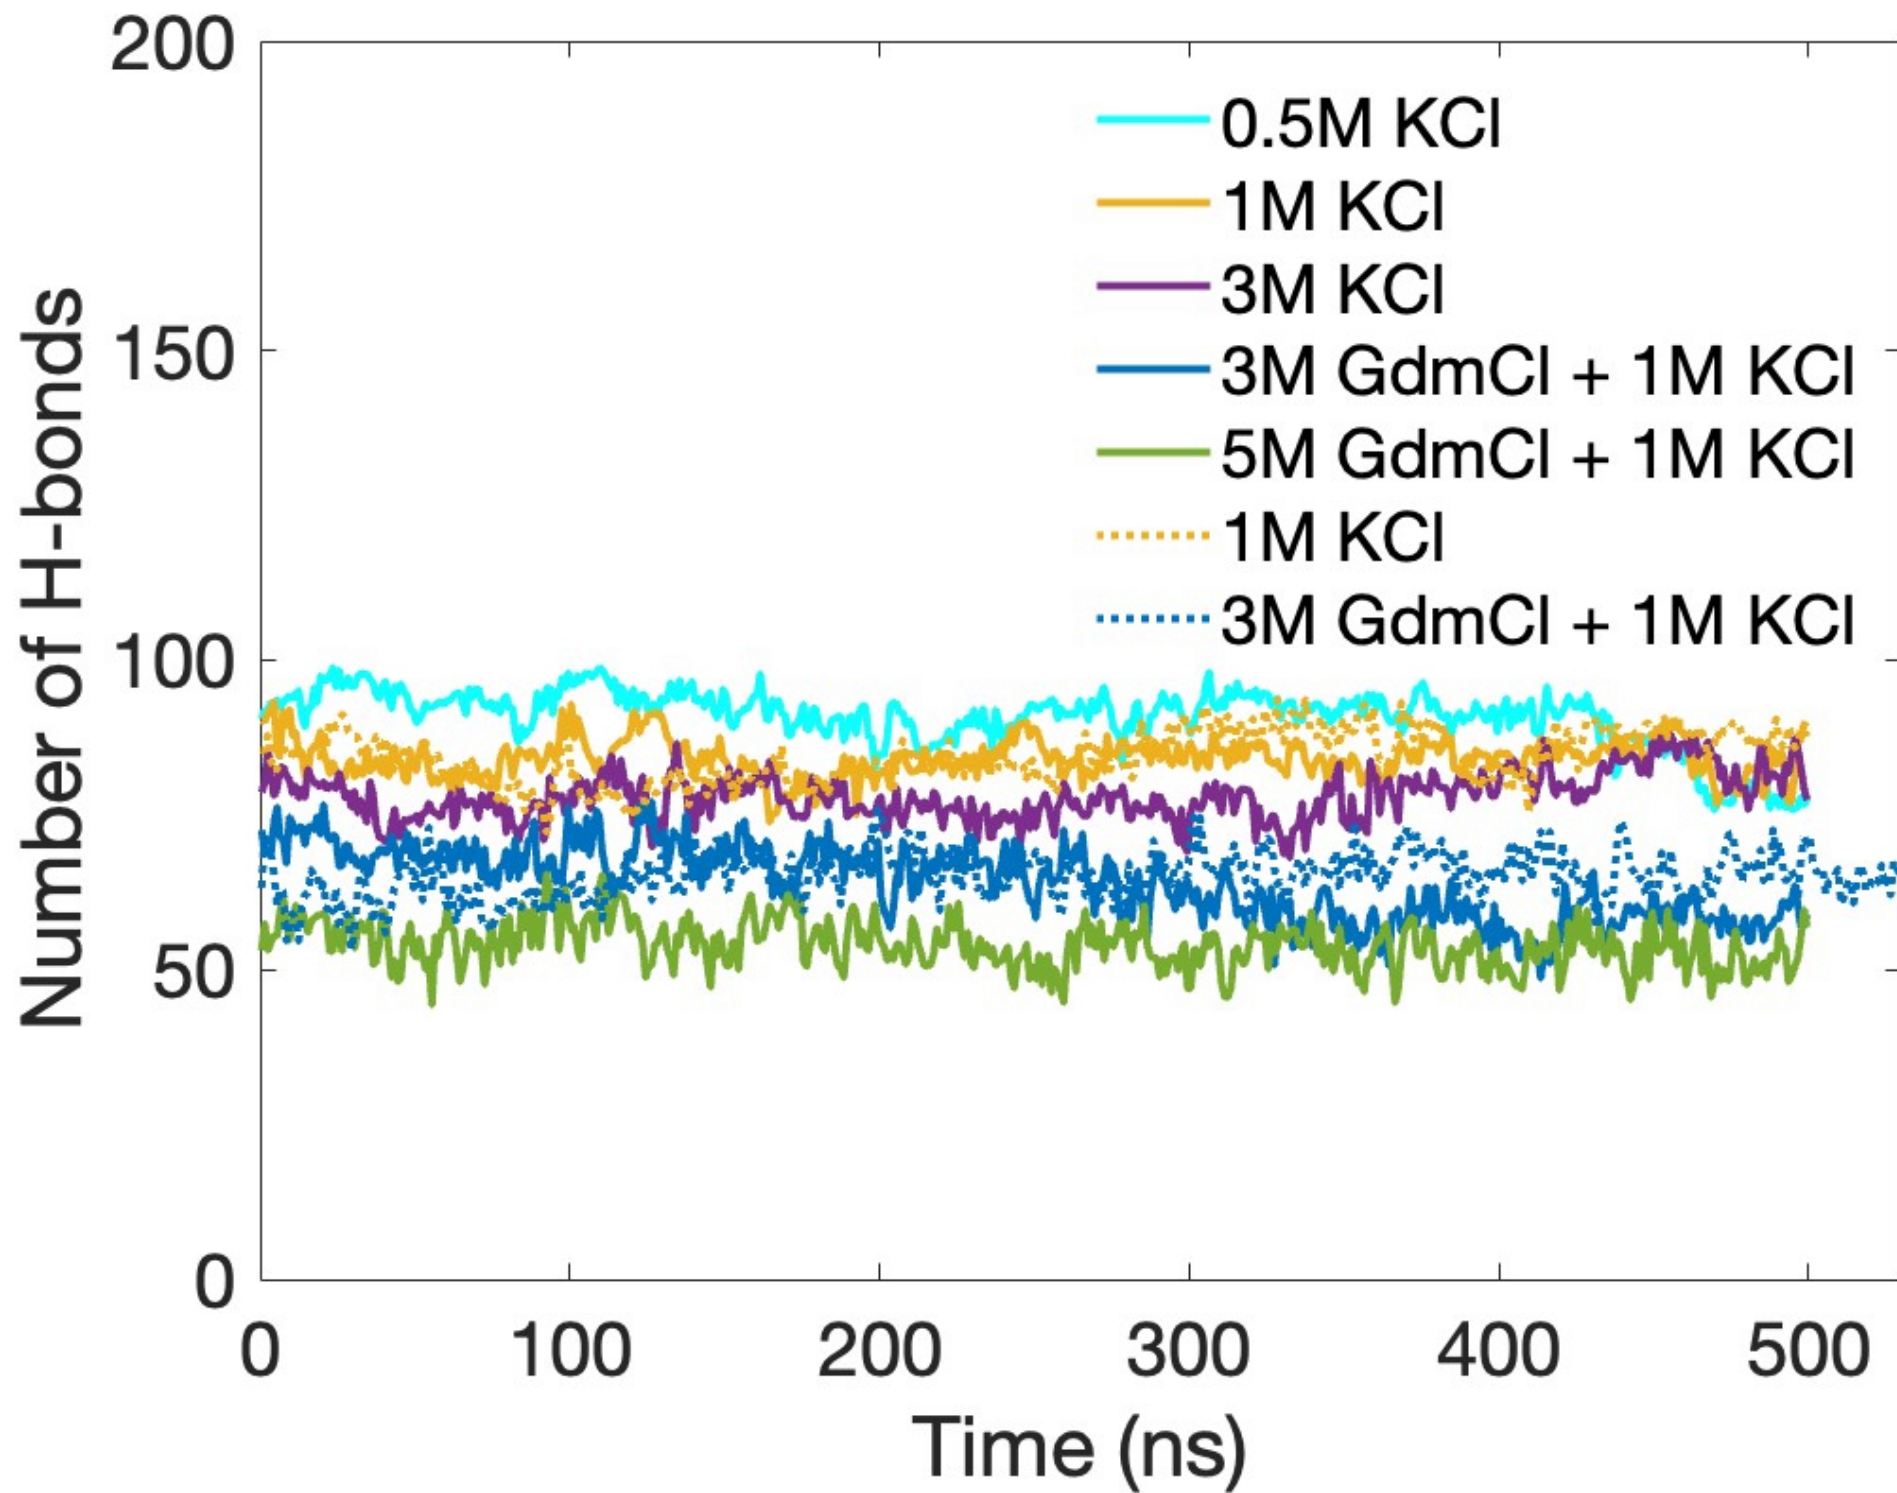

Supplement: d4nr03966a6.pdf [file d4nr03966a6.pdf]

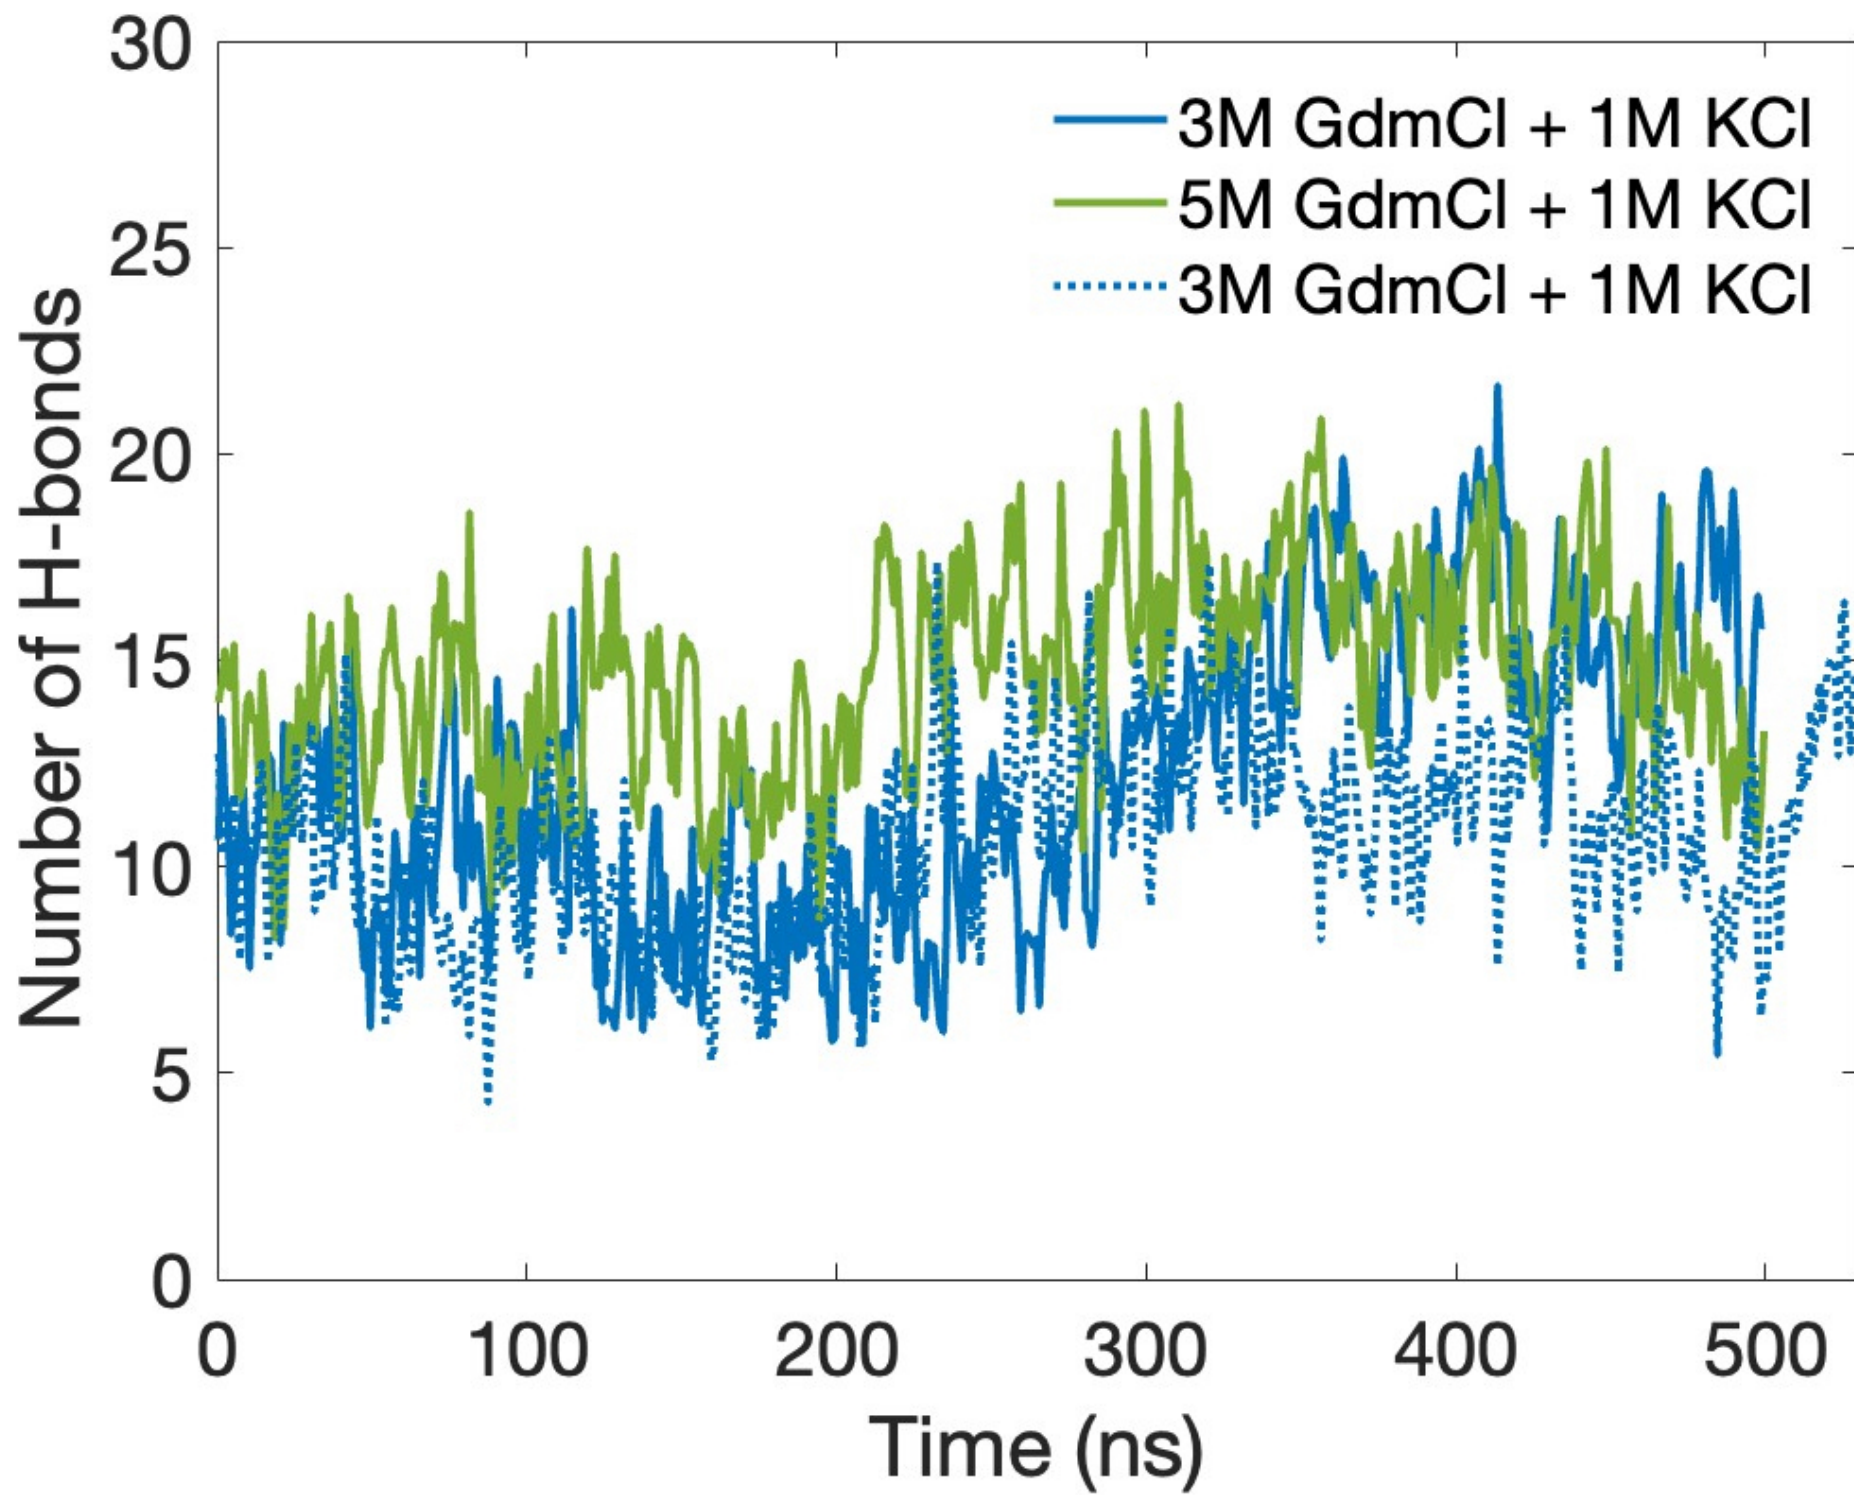

Supplement: d4nr03966a7.pdf [file d4nr03966a7.pdf]

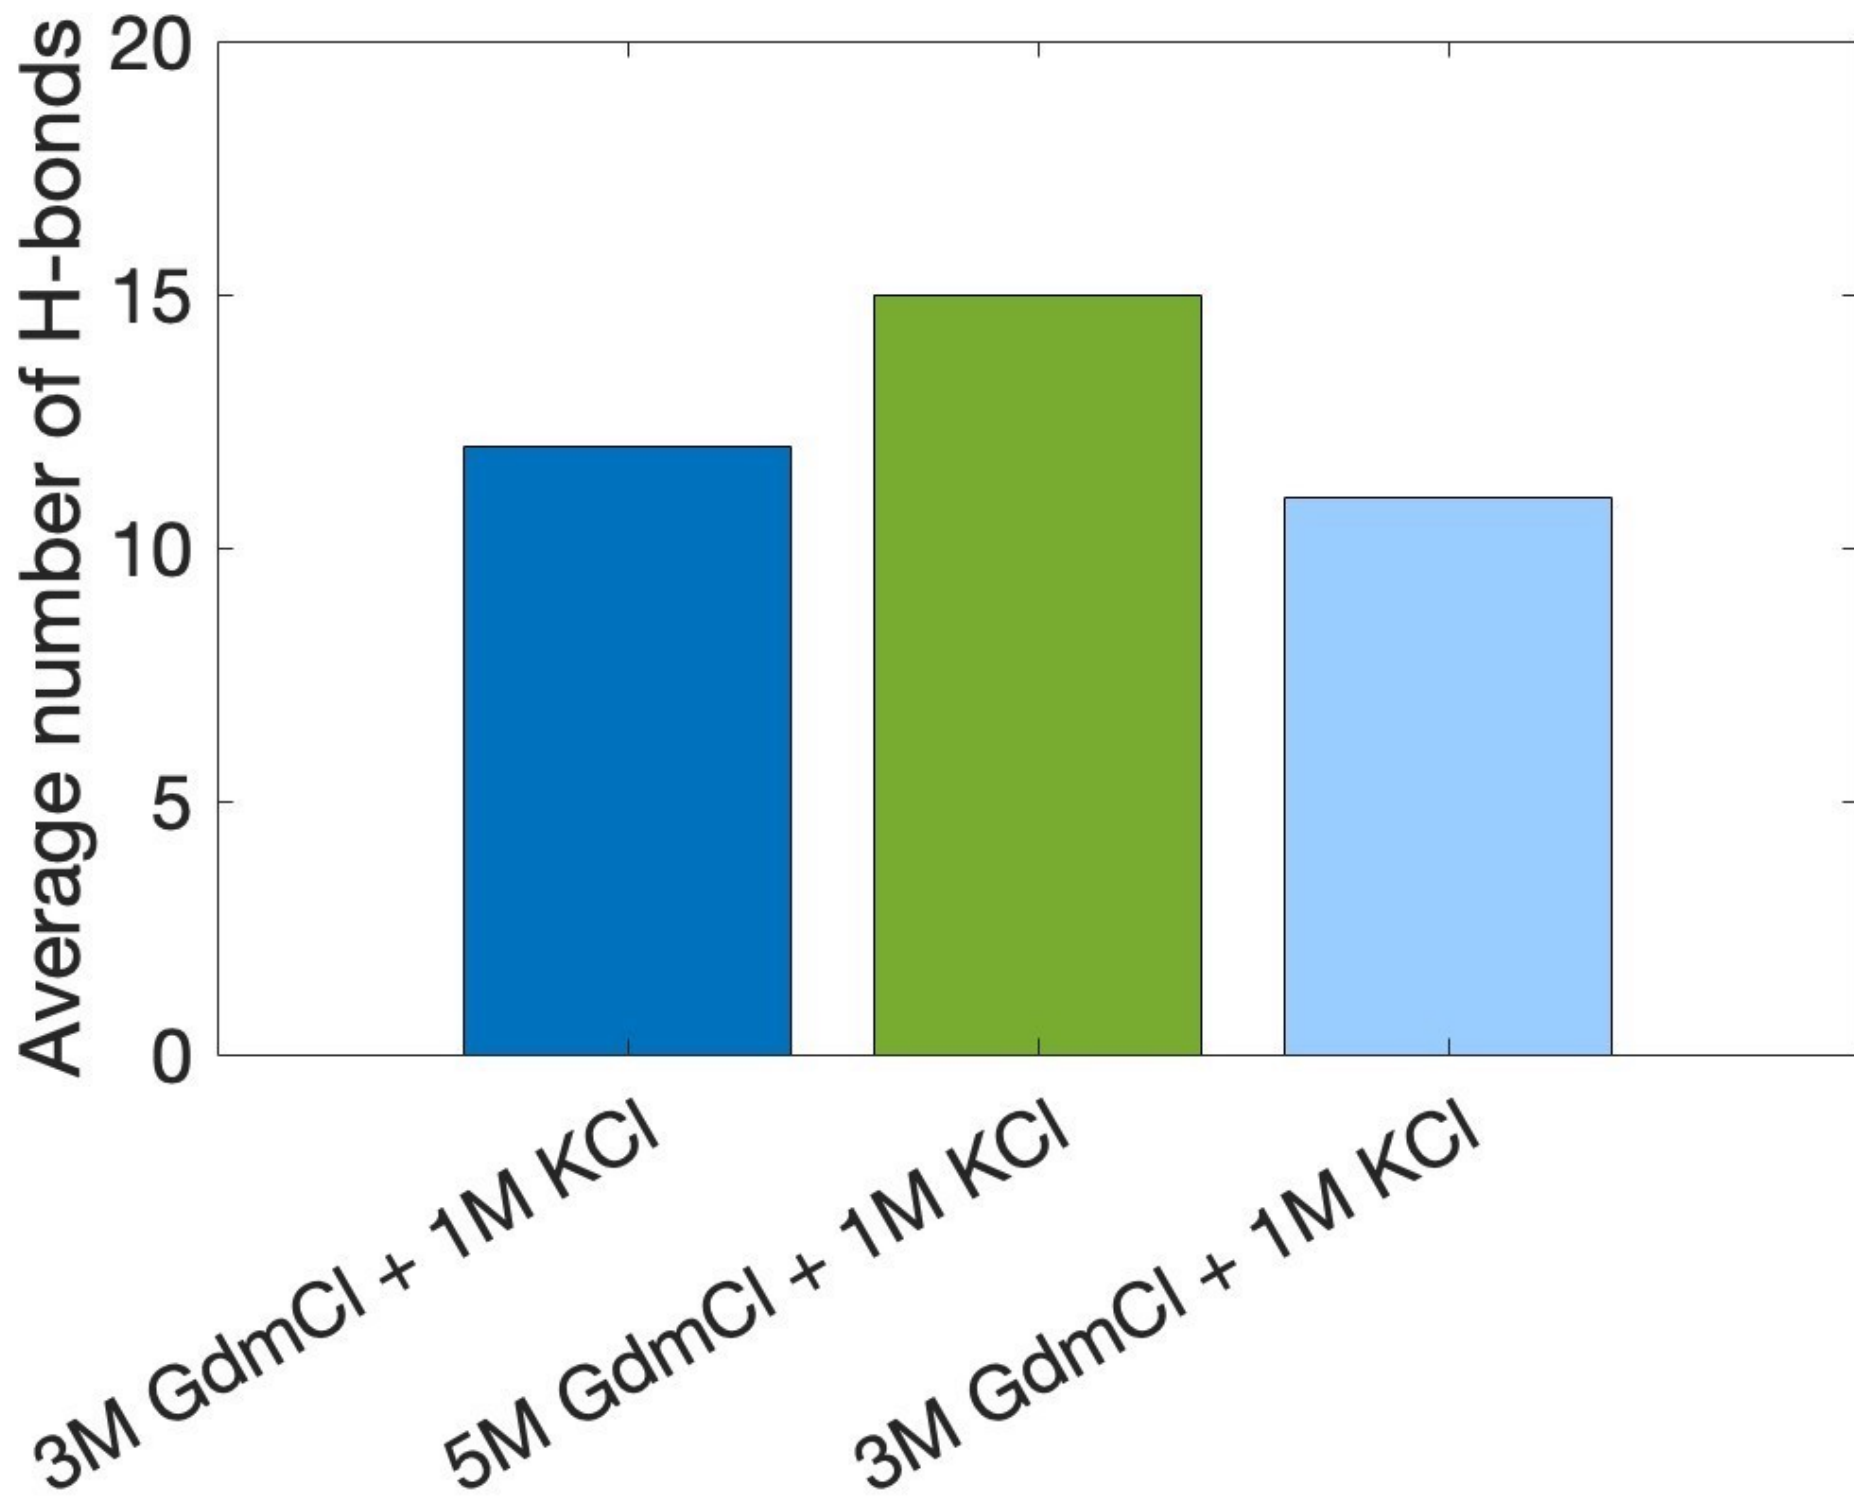

Supplement: d4nr03966a8.pdf [file d4nr03966a8.pdf]
